# Supplementary material for: A Molecular Video-derived Foundation Model Streamlines Scientific Drug Discovery
Source: Research Square preprint supplement (doi:10.21203/rs.3.rs-3773235/v1), 2024-01-19
Supplement: Supplementary file 1 [file SupplementaryTables_S1-S18_Cheng.xlsx]

## Sheet: Table S1
	Table S1: 5 different types of state-of-the-art methods.
	Representation Category	Model	Input	Backbone	Pre-training database
	fingerprint	RF	Fingerprint	Random Reforest	-
		SVM	Fingerprint	Support Vector Machine	-
	sequence	{RNN, TRFM}_{LR, MLP, RF}	SMILES	RNN or Transformer	ChEMBL24 (0.861M)
		X-MOL	SMILES	Transformer	ZINC15 (1.1B)
	2D graph	GCN	Graph	GCN	-
		GIN	Graph	GIN	-
		Hu et al.	Graph	5-layer GIN	ZINC15 (2M)
		MolCLR	Graph	GCN+GIN	PubChem (10M)
		MGSSL	Graph	5-layer GIN	ZINC15 (250K)
		GraphLoG	Graph	5-layer GIN	ZINC15 (2M)
		GraphCL	Graph	5-layer GIN	ZINC15 (2M)
		GROVER	Graph	Gtransformer	ZINC + ChEMBL (10M)
		MPG	Graph	MolGNet	ZINC + ChEMBL (11M)
	3D graph	3D InfoMax	Geometry+Graph	PNA+Net3D	QM9(50k)+GEOM-Drugs(140k)+Qmugs(620k)
		GraphMVP	Geometry+Graph	5-layer GIN+SchNet	GEOM (50K)
		GEM	Geometry	GeoGNN	ZINC15 (20M)
		Uni-Mol	Geometry+Protein Pockets	Transformer	ZINC/ChemBL+PDB
	image	ImageMol	Image	ResNet18	PubChem (10M)

## Sheet: Table S2
	Table S2: The ROC-AUC performance of different methods on 10 main types of biochemical kinases from KinomeScan datasets with balanced scaffold split. All compared results are obtained from ImageMol.
		BTK	CDK4-cyclinD3	EGFR	FGFR1	FGFR2
	MoCLRGIN	0.556±0.118	0.778±0.171	0.583±0.067	0.695±0.249	0.667±0.132
	MoCLRGCN	0.602±0.129	0.944±0.039	0.750±0.051	0.619±0.378	0.667±0.052
	RNN_LR	0.611±0.000	0.667±0.000	0.536±0.000	0.771±0.000	0.741±0.000
	TRFM_LR	0.694±0.000	0.750±0.000	0.821±0.000	0.743±0.000	0.704±0.000
	RNN_MLP	0.556±0.023	0.833±0.000	0.536±0.029	0.848±0.059	0.716±0.046
	TRFM_MLP	0.537±0.013	0.639±0.039	0.667±0.061	0.643±0.031	0.741±0.000
	RNN_RF	0.546±0.013	0.917±0.000	0.548±0.017	0.476±0.027	0.685±0.055
	TRFM_RF	0.639±0.039	0.639±0.039	0.607±0.000	0.476±0.013	0.556±0.030
	CHEM-BERT	0.648±0.013	0.583±0.297	0.845±0.094	0.429±0.117	0.765±0.106
	ImageMol	0.843±0.026	0.917±0.068	0.857±0.000	0.857±0.023	0.852±0.052
	VideoMol	0.861±0.023	0.972±0.039	0.905±0.017	0.838±0.013	0.988±0.018
	------ Continue ------
		FGFR3	FGFR4	FLT3	KPCD3	MET	Average
	MoCLRGIN	0.760±0.039	0.773±0.121	0.722±0.091	0.571±0.107	0.611±0.236	0.6716
	MoCLRGCN	0.792±0.106	0.537±0.013	0.722±0.208	0.505±0.067	0.574±0.052	0.6712
	RNN_LR	0.646±0.015	0.528±0.000	0.778±0.000	0.457±0.000	0.796±0.026	0.6531
	TRFM_LR	0.812±0.000	0.639±0.000	0.611±0.000	0.438±0.027	0.778±0.000	0.699
	RNN_MLP	0.469±0.026	0.269±0.035	0.630±0.105	0.410±0.036	0.667±0.045	0.5934
	TRFM_MLP	0.802±0.015	0.676±0.035	0.667±0.136	0.219±0.027	0.556±0.000	0.6147
	RNN_RF	0.312±0.000	0.389±0.000	0.519±0.026	0.343±0.000	0.500±0.000	0.5235
	TRFM_RF	0.646±0.078	0.602±0.013	0.546±0.035	0.262±0.058	0.593±0.026	0.5566
	CHEM-BERT	0.438±0.077	0.528±0.060	0.574±0.189	0.557±0.091	0.944±0.000	0.6311
	ImageMol	0.854±0.064	0.833±0.045	0.722±0.120	0.762±0.088	0.963±0.026	0.846
	VideoMol	0.792±0.039	0.852±0.013	0.981±0.026	0.819±0.014	0.981±0.026	0.8989

## Sheet: Table S3
	Table S3: The RMSE and MAE performance of different methods on 10 GPCR with balanced scaffold split. The lower the value, the better the performance. All compared results are obtained from ImageMol.
		1. 5HT1A		2. 5HT2A		3. AA1R
		RMSE	MAE	RMSE	MAE	RMSE	MAE
	MoCLRGIN	0.850±0.021	0.670±0.012	0.853±0.019	0.642±0.014	0.786±0.015	0.588±0.009
	MoCLRGCN	0.949±0.027	0.764±0.014	0.875±0.008	0.681±0.024	0.856±0.026	0.662±0.026
	RNN_LR	1.574±0.091	0.937±0.019	1.602±0.245	1.103±0.151	1.073±0.087	0.762±0.057
	TRFM_LR	1.636±0.004	1.109±0.001	1.389±0.000	0.999±0.001	1.060±0.003	0.810±0.001
	RNN_MLP	0.957±0.013	0.768±0.010	1.167±0.010	0.890±0.003	0.848±0.004	0.662±0.008
	TRFM_MLP	0.939±0.034	0.730±0.025	1.013±0.026	0.728±0.021	0.878±0.051	0.657±0.031
	RNN_RF	0.788±0.004	0.617±0.004	1.001±0.001	0.747±0.001	0.717±0.003	0.554±0.002
	TRFM_RF	0.855±0.001	0.672±0.001	1.011±0.002	0.777±0.002	0.740±0.001	0.568±0.001
	CHEM-BERT	0.876±0.018	0.706±0.012	0.909±0.057	0.682±0.056	0.734±0.038	0.544±0.027
	ImageMol	0.776±0.012	0.620±0.014	0.780±0.017	0.578±0.022	0.711±0.012	0.554±0.009
	VideoMol	0.723±0.011	0.559±0.008	0.775±0.017	0.577±0.009	0.674±0.001	0.504±0.003
		4. AA2AR		5. AA3R		6. CNR2
		RMSE	MAE	RMSE	MAE	RMSE	MAE
	MoCLRGIN	0.748±0.012	0.588±0.008	0.840±0.014	0.692±0.010	0.926±0.047	0.758±0.036
	MoCLRGCN	0.819±0.011	0.651±0.008	0.855±0.010	0.700±0.011	0.978±0.023	0.803±0.021
	RNN_LR	1.801±0.600	1.193±0.335	2.295±0.463	1.190±0.155	5.505±0.093	1.611±0.032
	TRFM_LR	1.130±0.000	0.906±0.000	1.155±0.001	0.919±0.001	1.700±0.001	1.213±0.000
	RNN_MLP	0.967±0.002	0.773±0.005	0.883±0.010	0.707±0.012	1.091±0.015	0.881±0.013
	TRFM_MLP	0.948±0.013	0.744±0.005	0.945±0.010	0.749±0.014	1.144±0.055	0.903±0.038
	RNN_RF	0.887±0.002	0.692±0.001	0.796±0.009	0.624±0.007	0.965±0.002	0.766±0.001
	TRFM_RF	0.926±0.003	0.735±0.004	0.856±0.001	0.701±0.002	0.965±0.002	0.800±0.002
	CHEM-BERT	0.862±0.071	0.674±0.058	0.861±0.058	0.684±0.047	0.925±0.051	0.727±0.041
	ImageMol	0.734±0.015	0.573±0.009	0.793±0.008	0.634±0.001	0.905±0.004	0.717±0.015
	VideoMol	0.726±0.002	0.554±0.003	0.786±0.006	0.617±0.004	0.890±0.013	0.702±0.009
		7. DRD2		8. DRD3		9. HRH3
		RMSE	MAE	RMSE	MAE	RMSE	MAE
	MoCLRGIN	0.814±0.009	0.591±0.007	0.858±0.017	0.673±0.022	0.734±0.006	0.581±0.004
	MoCLRGCN	0.855±0.022	0.634±0.017	0.914±0.024	0.725±0.025	0.740±0.016	0.576±0.006
	RNN_LR	1.142±0.077	0.839±0.038	1.316±0.011	0.942±0.005	1.616±0.236	0.943±0.070
	TRFM_LR	1.000±0.000	0.719±0.000	1.219±0.000	0.914±0.000	1.169±0.002	0.911±0.002
	RNN_MLP	0.895±0.006	0.694±0.005	1.021±0.007	0.819±0.007	0.871±0.015	0.702±0.011
	TRFM_MLP	0.919±0.016	0.686±0.016	1.012±0.041	0.790±0.023	0.863±0.011	0.676±0.009
	RNN_RF	0.837±0.001	0.612±0.001	0.861±0.001	0.685±0.001	0.771±0.002	0.613±0.002
	TRFM_RF	0.864±0.001	0.636±0.002	0.904±0.001	0.717±0.001	0.770±0.002	0.602±0.001
	CHEM-BERT	0.816±0.011	0.587±0.013	0.803±0.029	0.631±0.026	0.770±0.033	0.594±0.022
	ImageMol	0.772±0.014	0.573±0.009	0.735±0.018	0.576±0.014	0.710±0.006	0.561±0.006
	VideoMol	0.742±0.004	0.556±0.005	0.715±0.014	0.554±0.012	0.674±0.007	0.515±0.006
		10. OPRM
		RMSE	MAE
	MoCLRGIN	0.856±0.008	0.664±0.016
	MoCLRGCN	0.853±0.009	0.653±0.020
	RNN_LR	2.649±1.024	1.744±0.614
	TRFM_LR	1.694±0.001	1.282±0.000
	RNN_MLP	1.022±0.014	0.781±0.008
	TRFM_MLP	1.084±0.009	0.849±0.007
	RNN_RF	0.876±0.010	0.671±0.009
	TRFM_RF	0.852±0.002	0.660±0.003
	CHEM-BERT	0.893±0.024	0.672±0.019
	ImageMol	0.849±0.018	0.645±0.015
	VideoMol	0.795±0.015	0.579±0.011

## Sheet: Table S4
	Table S4: The ROC-AUC performance (%) of different methods on 7 molecular property prediction benchmarks with scaffold split. The gray, blue, orange, and green represent models without pre-training, sequence-based models, graph-based models, and vision-based models, respectively. The results of all comparison methods are from ImageMol.
		BBBP	Tox21	ClinTox	HIV	BACE	SIDER	ToxCast
	RF	71.4±0.0	76.9±1.5	71.3±5.6	78.1±0.6	86.7±0.8	68.4±0.9	-
	SVM	72.9±0.0	81.8±1.0	66.9±9.2	79.2±0.0	86.2±0.0	68.2±1.3	-
	GCN	71.8±0.9	70.9±2.6	62.5±2.8	74.0±3.0	71.6±2.0	53.6±3.2	-
	GIN	65.8±4.5	74.0±0.8	58.0±4.4	75.3±1.9	70.1±5.4	57.3±1.6	-
	X-MOL	71.6±1.1	75.1±0.8	79.6±1.6	74.1±0.5	78.1±1.2	61.3±0.6	62.1±0.2
	Hu et al.	70.8±1.5	78.7±0.4	78.9±2.4	80.2±0.9	85.9±0.8	65.2±0.9	-
	MGSSL	70.5±1.1	76.5±0.3	80.7±2.1	79.5±1.1	79.7±0.8	61.8±0.8	64.1±0.7
	3D InfoMax	69.1±1.1	74.5±0.7	59.4±3.2	76.1±1.3	79.4±1.9	53.4±3.3	64.4±0.9
	GraphLoG	67.8±1.7	73.0±0.3	62.0±1.8	-	78.8±0.7	57.4±2.3	62.2±0.4
	GraphCL	67.5±3.3	74.4±0.7	78.9±4.2	75.0±0.4	68.7±7.8	60.1±1.3	62.8±0.2
	GraphMVP	72.4±1.6	75.9±0.5	79.1±2.8	77.0±1.2	81.2±0.9	63.9±1.2	63.1±0.2
	GROVER	71.8±0.5	76.5±0.7	84.3±2.1	78.6±0.6	82.2±0.7	63.7±0.5	63.5±0.8
	MPG-10M	72.8±0.6	77.1±0.8	90.1±3.0	78.5±0.9	83.8±1.3	64.4±0.2	63.4±0.3
	MolCLR	71.6±0.7	75.0±0.4	91.9±1.2	78.3±0.4	81.9±1.5	59.9±0.9	-
	GEM	72.4±0.4	78.1±0.1	90.1±1.3	80.6±0.9	85.6±1.1	67.2±0.4	69.2±0.4
	Uni-Mol	72.9±0.6	79.6±0.5	91.9±1.8	80.8±0.3	85.7±0.2	65.9±1.3	69.6±0.1
	ImageMol	73.9±0.2	77.3±0.1	85.1±1.4	79.7±0.2	83.9±0.5	66.0±0.1	65.3±0.2
	VideoMol	74.6±0.2	79.8±0.5	87.2±3.7	81.1±0.6	86.8±0.3	69.6±0.3	70.9±0.2
	Rank	1	2	3	1	1	1	1

## Sheet: Table S5
	Table S5: The RMSE or MAE performance of different methods on 5 molecular property prediction benchmarks with scaffold split. We report RMSE for FreeSolv, ESOL and Lipo datasets and MAE for QM7 and QM8 datasets, respectively. The gray, orange, and green represent models without pre-training, graph-based models, and vision-based models, respectively. GROVER, MPG and ImageMol results from imagemol …
		FreeSolv	ESOL	Lipo	QM7	QM8
	RF	2.03±0.22	1.07±0.19	0.88±0.04	-	-
	SVM	3.14±0.00	1.50±0.00	0.82±0.00	156.9±0.00	0.0543 ± 0.0010
	GCN	2.87±0.14	1.43±0.05	0.85±0.08	122.9 ± 2.2	0.0366 ± 0.0011
	GIN	2.76±0.18	1.45±0.02	0.85±0.07	124.8 ± 0.7	0.0371 ± 0.0009
	Hu et al.	2.83±0.12	1.22±0.02	0.74±0.00	110.2 ± 6.4	0.0191 ± 0.0003
	N-Gram	2.51±0.19	1.10±0.03	0.88±0.12	125.6 ± 1.5	0.0320 ± 0.0032
	MolCLRGCN	2.39±0.14	1.16±0.00	0.78±0.01	83.1 ± 4.0	0.0181 ± 0.0002
	MolCLRGIN	2.20±0.20	1.11±0.01	0.65±0.08	87.2 ± 2.0	0.0174 ± 0.0013
	GROVER	2.48±0.05	0.99±0.03	0.66±0.01	-	-
	MPG	2.05±0.10	1.02±0.11	0.69±0.02	-	-
	ImageMol	2.02±0.07	0.97±0.07	0.72±0.01	-	-
	VideoMol	1.82±0.11	0.80±0.01	0.62±0.01	66.9±1.5	0.0175±0.0001
	Rank	1	1	1	1	2
	=== continue ===
		QM9
	D-MPNN	0.00814(0.00001)
	Aattentive FP	0.00812(0.00001)
	N-GramRF	0.01037(0.00016)
	N-GramXGB	0.00964(0.00031)
	PretrainGNN	0.00922(0.00004)
	GROVERbase	0.00984(0.00055)
	GROVERlarge	0.00986(0.00025)
	VideoMol	0.00789(0.00015)
	Rank	1

## Sheet: Table S6
	Table S6: The ROC-AUC performance of different methods on 11 SARS-CoV-2 datasets with balanced scaffold split. All compared results are obtained from ImageMol.
		3CL	ACE2	hCYTOX	MERS-PPE_cs	MERS-PPE	CoV1-PPE_cs	CoV1-PPE	CPE	Cytotox	AlphaLISA	TruHit	Mean
	REDIAL-2020	0.713	0.753	0.71	0.703	0.696	0.661	0.665	0.651	0.688	0.79	0.734	0.706
	ImageMol	0.762±0.007	0.720±0.001	0.727±0.009	0.771±0.009	0.773±0.011	0.775±0.005	0.703±0.008	0.669±0.011	0.728±0.001	0.793±0.007	0.806±0.006	0.748
	VideoMol	0.705±0.008	0.759±0.020	0.765±0.003	0.828±0.027	0.814±0.004	0.830±0.034	0.728±0.007	0.747±0.013	0.761±0.002	0.841±0.004	0.862±0.002	0.786

## Sheet: Table S8
	Table S8: The anti-BACE1 drugs with an IC50 threshold of 80 from MedChemExpress website. The cas is the unique identifier for a drug.
		name	cas	IC50(nM)	canonical smiles
	1	BACE-1 inhibitor 2	2563970-92-1	1.5	C[C@H]1C[C@H]2CC(F)(F)C(N)=N[C@@]2(c2cc(NC(=O)c3cnc(OCF)cn3)ccc2F)CO1
	2	BACE-1 inhibitor 1	1262858-14-9	56	NC1=N[C@@](c2cc(NC(=O)c3ccc(Br)cn3)ccc2F)(C(F)F)COC1
	3	BACE1-IN-13	1397683-26-9	2.9	COc1cnc(C(=O)Nc2ccc(F)c([C@]3(C)Cn4nc(C#N)cc4C(N)=N3)c2)cn1
	4	BACE1-IN-1	1310347-50-2	32	C[C@]1(c2cc(NC(=O)c3ccc(C#N)cn3)ccc2F)N=C(N)OCC1(F)F
	5	BACE1-IN-6	2079945-75-6	1.5	C[C@]1(c2cc(/C=C(\F)c3ccc(C#N)cn3)ccc2F)N=C(N)S[C@@]2(C(=O)N3CCOCC3)C[C@H]21
	6	BACE1-IN-4	2361157-92-6	3.8	C[C@]1(c2cc(NC(=O)c3cnc(OCF)cn3)ccc2F)N=C(N)SCC12CCS(=O)(=O)CC2
	7	BACE1-IN-2	1352416-78-4	22	C[C@]1(c2cc(NC(=O)c3ccc(C#N)cn3)ccc2F)N=C(N)CO[C@H]1C(F)(F)F
	8	BACE1/2-IN-1	2671036-34-1	10	C[C@@H]1C[C@H]1COC(C)(C)[C@@H]1C[C@H]1[C@]12CN(c3ncccn3)C[C@H]1CSC(N)=N2
	9	Umibecestat	1387560-01-1	11	C[C@@]1(c2nc(NC(=O)c3ncc(C(F)(F)F)cc3Cl)ccc2F)CO[C@@](C)(C(F)(F)F)C(N)=N1
	10	LY2886721	1262036-50-9	20.3	NC1=N[C@@]2(c3cc(NC(=O)c4ccc(F)cn4)ccc3F)COC[C@H]2CS1
	11	beta-Secretase Inhibitor IV	797035-11-1	15.6	C[C@@H](NC(=O)c1cc(C(=O)N[C@@H](Cc2ccccc2)[C@H](O)CNC2CC2)cc(N(C)S(C)(=O)=O)c1)c1ccccc1
	12	AMG-8718	1215868-94-2	0.7	CC1(C#Cc2cnc3c(c2)[C@]2(COC(N)=N2)c2cc(-c4cccnc4F)ccc2O3)COC1
	13	PF-06751979	1818339-66-0	7.3	C[C@H]1C[C@H]2CSC(N)=N[C@@]2(c2nc(NC(=O)c3ccc(OC(F)F)cn3)cs2)CO1
	14	JNJ-67569762	2380313-26-6	2.7	CCS(=O)(=O)[C@]1(C)CC[C@@](CF)(c2cc(NC(=O)c3cc4c(cn3)OC(F)(F)O4)ccc2F)N=C1N
	15	NB-360	1262857-73-7	5	Cc1cc(C#N)cnc1C(=O)Nc1ccc(F)c([C@]2(C)CO[C@@](C)(C(F)(F)F)C(N)=N2)c1
	16	AM-6494	1874232-80-0	0.4	C#CCOc1cnc(C(=O)Nc2cc(F)c(F)c([C@@]3(C)N=C(N)S[C@@]4(COC)C[C@H]43)c2)cn1

## Sheet: Table S9
	Table S9: The anti-COX-1 drugs with an IC50 threshold of 100 from MedChemExpress website. The cas is the unique identifier for a drug.
	index	name	cas	IC50(nM)	canonical smiles
	1	Indomethacin	53-86-1	18	COc1ccc2c(c1)c(CC(=O)O)c(C)n2C(=O)c1ccc(Cl)cc1
	2	Indomethacin sodium	7681-54-1	18	COc1ccc2c(c1)c(CC(=O)[O-])c(C)n2C(=O)c1ccc(Cl)cc1.[Na+]
	3	Indomethacin sodium hydrate	74252-25-8	18	COc1ccc2c(c1)c(CC(=O)OC/C=C(\C)CC/C=C(\C)CCC=C(C)C)c(C)n2C(=O)c1ccc(Cl)cc1
	4	Diclofenac	15307-86-5	4	O=C(O)Cc1ccccc1Nc1c(Cl)cccc1Cl
	5	Diclofenac potassium	15307-81-0	4	O=C([O-])Cc1ccccc1Nc1c(Cl)cccc1Cl.[K+]
	6	Diclofenac diethylamine	78213-16-8	4	CCNCC.O=C(O)Cc1ccccc1Nc1c(Cl)cccc1Cl
	7	Diclofenac Sodium	15307-79-6	4	O=C([O-])Cc1ccccc1Nc1c(Cl)cccc1Cl.[Na+]
	8	Mofezolac	78967-07-4	1.44	COc1ccc(-c2noc(CC(=O)O)c2-c2ccc(OC)cc2)cc1
	9	Tenidap	120210-48-2	30	NC(=O)N1C(=O)/C(=C(\O)c2cccs2)c2cc(Cl)ccc21
	10	Tenidap-d3	142741-60-4	30	NC(=O)N1C(=O)C(C(=O)c2cccs2)c2cc(Cl)ccc21
	11	SC-560	188817-13-2	9	COc1ccc(-n2nc(C(F)(F)F)cc2-c2ccc(Cl)cc2)cc1
	12	Lornoxicam	70374-39-9	5	CN1C(C(=O)Nc2ccccn2)=C(O)c2sc(Cl)cc2S1(=O)=O
	13	S-(+)-Ketoprofen	22161-81-5	1.9	C[C@H](C(=O)O)c1cccc(C(=O)c2ccccc2)c1
	14	FR122047	130717-51-0	28	COc1ccc(-c2nc(C(=O)N3CCN(C)CC3)sc2-c2ccc(OC)cc2)cc1.Cl
	15	Ketorolac tromethamine salt	74103-07-4	20	NC(CO)(CO)CO.O=C(c1ccccc1)c1ccc2n1CCC2C(=O)O
	16	Eltenac	72895-88-6	30	O=C(O)Cc1cscc1Nc1c(Cl)cccc1Cl
	17	Bromfenac	91714-94-2	5.56	Nc1c(CC(=O)O)cccc1C(=O)c1ccc(Br)cc1
	18	Bromfenac sodium	91714-93-1	5.56	Nc1c(CC(=O)[O-])cccc1C(=O)c1ccc(Br)cc1.[Na+]
	19	Ketoprofen	22071-15-4	2	CC(C(=O)O)c1cccc(C(=O)c2ccccc2)c1
	20	Ketoprofen (RP-19583) lysinate	57469-78-0	2	CC(C(=O)O)c1cccc(C(=O)c2ccccc2)c1.NCCCC[C@H](N)C(=O)O
	21	Ketorolac	74103-06-3	20	O=C(c1ccccc1)c1ccc2n1CCC2C(=O)O
	22	Ketorolac hemicalcium	167105-81-9	20	O=C(c1ccccc1)c1ccc2n1CCC2C(=O)O.[CaH2]

## Sheet: Table S10
	Table S10: The anti-COX-2 drugs with an IC50 threshold of 100 from MedChemExpress website. The cas is the unique identifier for a drug.
	index	name	cas	IC50(nM)	canonical smiles
	1	COX-2-IN-28	2413565-18-9	54	CSc1nc2ccccc2n1-c1csc(NCC(C)=NN=c2scc(-c3ccc(C)cc3)n2-c2ccccc2)n1
	2	COX-2-IN-26	2413565-19-0	67	CSc1nc2ccccc2n1-c1csc(NCC(C)=NN=C2SCC(=O)N2c2ccccc2)n1
	3	COX-2-IN-20	2529451-43-0	17.9	COC(=O)c1nc(CCl)n(-c2ccc(F)cc2)n1
	4	COX-2-IN-21	2519631-11-7	39	COc1cc(C2CC(c3cccc(-n4cnnn4)c3)=NN2C(C)=O)cc(OC)c1OC
	5	COX-2/15-LOX-IN-1	2413565-15-6	75	CSc1nc2ccccc2n1-c1csc(NCC(C)=NNC(=S)Nc2ccccc2)n1
	6	COX-2-IN-17	2411390-10-6	20	COC(=O)[C@@H](N)Cc1cn(-c2nc(Cl)nc(N3CCCCC3)n2)c2ccccc12
	7	COX-2/5-LOX-IN-2	2410384-59-5	10	NS(=O)(=O)c1ccc(-n2nc(C(=O)O)cc2-c2cc3ccccc3s2)cc1
	8	Diclofenac	15307-86-5	1.3	O=C(O)Cc1ccccc1Nc1c(Cl)cccc1Cl
	9	Diclofenac potassium	15307-81-0	1.3	O=C([O-])Cc1ccccc1Nc1c(Cl)cccc1Cl.[K+]
	10	Diclofenac diethylamine	78213-16-8	1.3	CCNCC.O=C(O)Cc1ccccc1Nc1c(Cl)cccc1Cl
	11	Diclofenac Sodium	15307-79-6	1.3	O=C([O-])Cc1ccccc1Nc1c(Cl)cccc1Cl.[Na+]
	12	Rofecoxib	162011-90-7	26	CS(=O)(=O)c1ccc(C2=C(c3ccccc3)C(=O)OC2)cc1
	13	Valdecoxib	181695-72-7	5	Cc1onc(-c2ccccc2)c1-c1ccc(S(N)(=O)=O)cc1
	14	Indomethacin (Indometacin) sodium	7681-54-1	26	COc1ccc2c(c1)c(CC(=O)[O-])c(C)n2C(=O)c1ccc(Cl)cc1.[Na+]
	15	Indomethacin	53-86-1	26	COc1ccc2c(c1)c(CC(=O)O)c(C)n2C(=O)c1ccc(Cl)cc1
	16	Anti-inflammatory agent 8	1103920-19-9	0.09	Cc1c(C(=O)NNC(=S)Nc2ccccc2)sc2nc3ccccc3n12
	17	Indomethacin (Indometacin) sodium hydrateis	74252-25-8	26	COc1ccc2c(c1)c(CC(=O)OC/C=C(\C)CC/C=C(\C)CCC=C(C)C)c(C)n2C(=O)c1ccc(Cl)cc1
	18	SC-58125	162054-19-5	40	CS(=O)(=O)c1ccc(-n2nc(C(F)(F)F)cc2-c2ccc(F)cc2)cc1
	19	S-2474	158089-95-3	11	CCN1CC/C(=C\c2cc(C(C)(C)C)c(O)c(C(C)(C)C)c2)S1(=O)=O
	20	FR-188582	189699-82-9	17	CS(=O)(=O)c1ccc(-c2cc(Cl)nn2-c2ccccc2)cc1
	21	DuP-697	88149-94-4	10	CS(=O)(=O)c1ccc(-c2cc(Br)sc2-c2ccc(F)cc2)cc1
	22	Celecoxib	169590-42-5	40	Cc1ccc(-c2cc(C(F)(F)F)nn2-c2ccc(S(N)(=O)=O)cc2)cc1
	23	Indomethacin farnesil	85801-02-1	26	COc1ccc2c(c1)c(CC(=O)OCC=C(C)CCC=C(C)CCC=C(C)C)c(C)n2C(=O)c1ccc(Cl)cc1
	24	Lornoxicam	70374-39-9	8	CN1C(C(=O)Nc2ccccn2)=C(O)c2sc(Cl)cc2S1(=O)=O
	25	Tilmacoxib	180200-68-4	85	Cc1nc(C2CCCCC2)c(-c2ccc(S(N)(=O)=O)c(F)c2)o1
	26	S-(+)-Ketoprofen	22161-81-5	27	C[C@H](C(=O)O)c1cccc(C(=O)c2ccccc2)c1
	27	SC57666	158959-32-1	26	CS(=O)(=O)c1ccc(C2=C(c3ccc(F)cc3)CCC2)cc1
	28	Eltenac	72895-88-6	30	O=C(O)Cc1cscc1Nc1c(Cl)cccc1Cl
	29	Bromfenac	91714-94-2	7.45	Nc1c(CC(=O)O)cccc1C(=O)c1ccc(Br)cc1
	30	Bromfenac sodium	91714-93-1	7.45	Nc1c(CC(=O)[O-])cccc1C(=O)c1ccc(Br)cc1.[Na+]
	31	Desmethyl Celecoxib	170569-87-6	32	NS(=O)(=O)c1ccc(-n2nc(C(F)(F)F)cc2-c2ccccc2)cc1
	32	Imrecoxib	395683-14-4	18	CCCN1CC(c2ccc(S(C)(=O)=O)cc2)=C(c2ccc(C)cc2)C1=O
	33	Fenofibric acid	42017-89-0	48	CC(C)(Oc1ccc(C(=O)c2ccc(Cl)cc2)cc1)C(=O)O
	34	Thioflosulide	158205-05-1	2.3	CS(=O)(=O)Nc1cc2c(cc1Sc1ccc(F)cc1F)C(=O)CC2
	35	Ketoprofen	22071-15-4	26	CC(C(=O)O)c1cccc(C(=O)c2ccccc2)c1

## Sheet: Table S11
	Table S11: The anti-EP4 drugs with an IC50 threshold of 30 from MedChemExpress website. The cas is the unique identifier for a drug.
	index	name	cas	IC50(nM)	canonical smiles
	1	EP4 receptor antagonist 1	2287259-07-6	6.1	C/C=C/c1nnn(Cc2ccc(C(F)(F)F)cc2)c1C(=O)N[C@@H](C)c1ccc(C(=O)O)cc1
	2	EP4 receptor antagonist 2	1965316-82-8	7.8	CC(C)NC(=O)c1ccc2c(c1)[C@]1(CCO2)C[C@H]1C(=O)Nc1cc(C#N)ccc1CCCC(=O)O
	3	BAY-1316957	1613264-40-6	15.3	CCn1c2ccc(C)cc2c2cc(-c3nc4c(C)c(C(=O)O)ccc4n3CCOC)ccc21
	4	TP-16	2332972-26-4	2.1	C[C@H](NC(=O)c1c(Cc2ccc(F)cc2)sc2c1CCOC2)c1ccc(C(=O)O)cc1
	5	Palupiprant	1369489-71-3	13.5	C[C@H](NC(=O)c1c(C(F)F)nn(C)c1Oc1cccc(C(F)(F)F)c1)c1ccc(C(=O)O)cc1
	6	CJ-42794	847728-01-2	10	C[C@H](NC(=O)c1cc(Cl)ccc1Oc1ccc(F)cc1)c1ccc(C(=O)O)cc1
	7	MK-2894	1006036-87-8	2.5	Cc1sc(C)c(C(=O)NC2(c3ccc(C(=O)O)cc3)CC2)c1Cc1ccc(C(F)(F)F)cc1
	8	MK-2894 sodium salt	1006036-88-9	2.5	Cc1sc(C)c(C(=O)NC2(c3ccc(C(=O)O)cc3)CC2)c1Cc1ccc(C(F)(F)F)cc1.[NaH]

[truncated: 10 more sheets: Table S12, Table S13, Table S14, Table S15, Table S16, Table S17, Table S18, Table S19, Table S20, Table S22]
